# Supplementary material
Source: publisher figshare collection journal article supplement (https://acs.figshare.com/ndownloader/files/3967507)
Supplement: Supplementary file 1 [file 3967507]

## Supporting Information

### A Facile Method for Fabricating Flexible Substrates with Embedded, Printed Silver Lines

Ankit Mahajan, Lorraine F. Francis\*, and C. Daniel Frisbie\*

A. Mahajan, Prof. L.F. Francis and Prof. C.D. Frisbie  
Department of Chemical Engineering and Materials Science  
University of Minnesota  
421 Washington Avenue S.E. Minneapolis, MN 55455, USA  
E-mail: frisbie@umn.edu, lfrancis@umn.edu

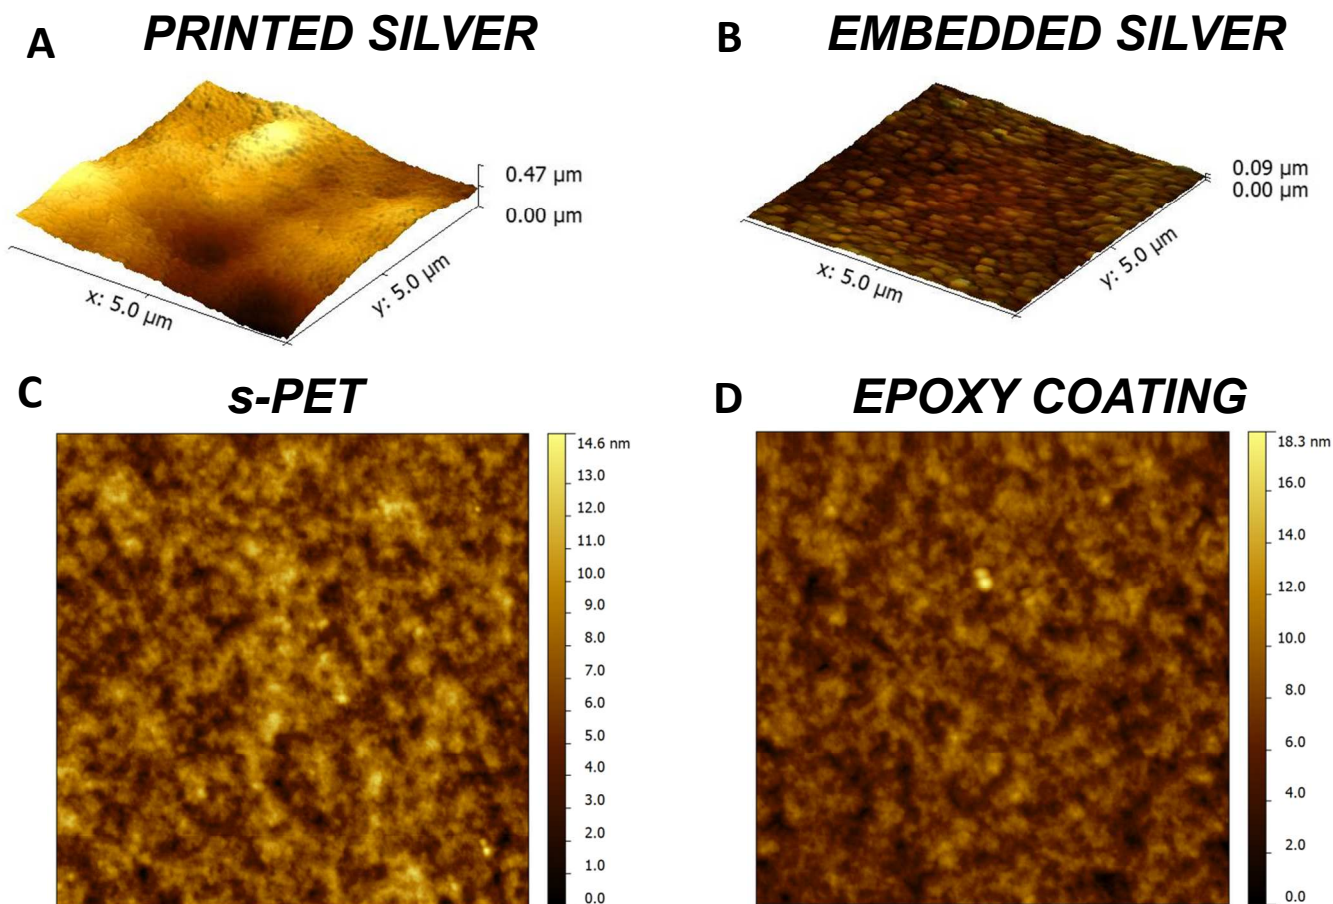

**Figure S1.** AFM tapping mode height images of a) printed (and sintered) silver (root mean square (rms) roughness 81.8 nm), b) embedded silver (rms roughness 8.3 nm), c) s-PET (rms roughness 1.80 nm) and d) epoxy coating (rms roughness 1.83 nm). Scan areas in both c and d are  $25 \mu\text{m}^2$ .

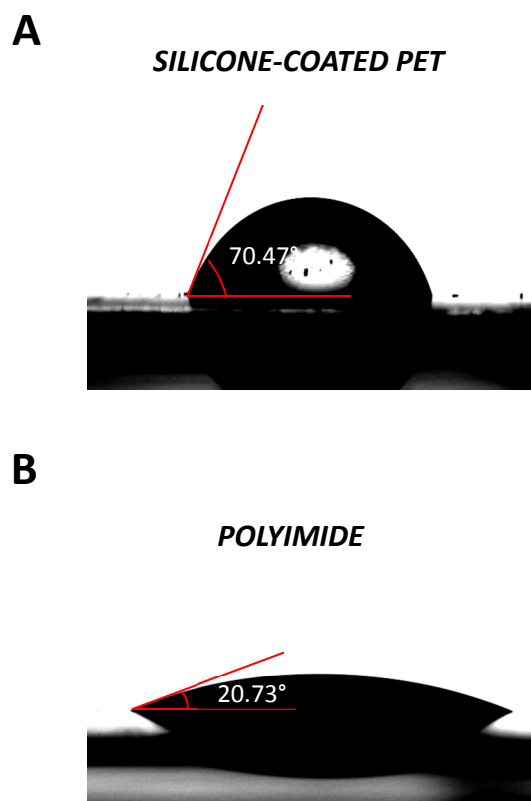

**Figure S2.** Comparison of contact angle of epoxy pre-polymer mixture on a) silicone-coated PET and b) polyimide substrates, suggesting stronger adhesion of the cured epoxy with the latter.

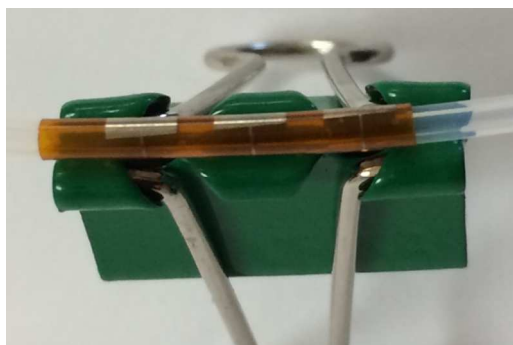

**Figure S3.** Optical micrograph of embedded silver lines and contact pads wrapped around 1 mm radius polyethylene tubing.

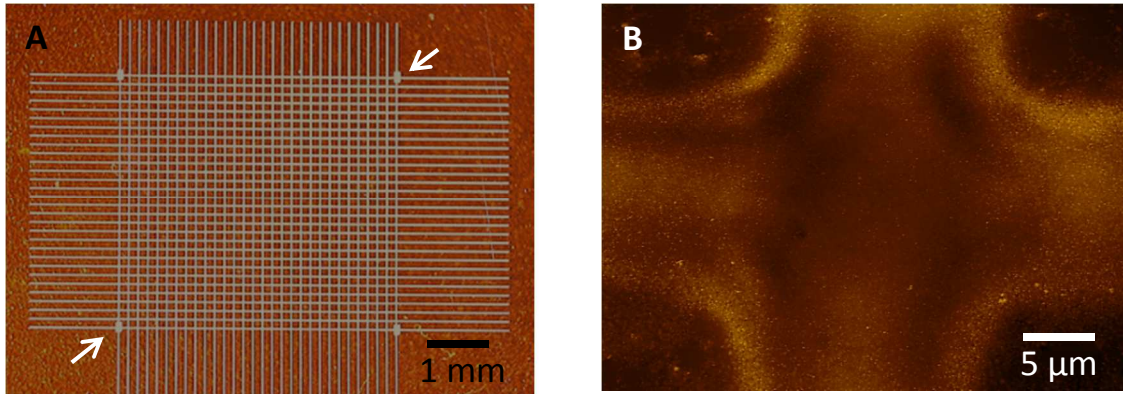

**Figure S4.** a) Optical microscope image of an embedded square grid of silver lines (width: 20  $\mu\text{m}$ , line spacing: 160  $\mu\text{m}$ ) comprising of 900 cross-overs. The measured electrical resistance between the highlighted points of the grid was 30.01  $\Omega$ , close to its as-printed value. b) AFM tapping mode height image revealing a buried cross-over in the above grid. Image height range is 100 nm.

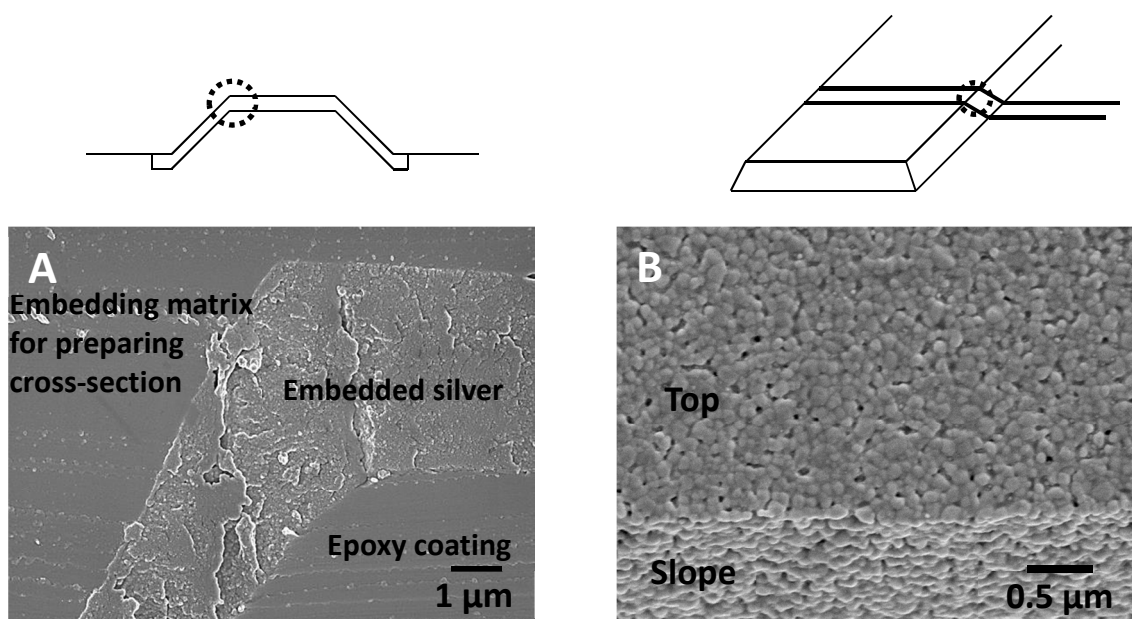

**Figure S5.** ICD on non-planar surfaces. a) Cross sectional SEM image displaying an embedded silver line over a sloped step. b) Top view SEM image showing the transition of the embedded silver line near the edge, free from cracks or other discontinuities.
